# Supplementary material for: ETV5 links the FGFR3 and Hippo signalling pathways in bladder cancer
Source: PubMed Central journal article supplement (PMC6450944; doi:10.1038/s41598-018-36456-3), 2019-04-05
Supplement: 41598_2018_36456_MOESM1_ESM.pdf [file 41598_2018_36456_MOESM1_ESM.pdf]

## ETV5 links the FGFR3 and Hippo signalling pathways in bladder cancer

Erica di Martino, Olivia Alder, Carolyn D. Hurst and Margaret A. Knowles

**Supplementary Table S1. ETV5 knockdown levels achieved in different cell lines.** Relative ETV5 expression in cells transduced with two different shRNA against ETV5 (sh155 and sh1189), or cells transduced with a scrambled shRNA, compared with control cells transduced with the empty vector. Sh155 achieved the best knockdown and was associated with the strongest phenotypic changes.

|                  | Control | Scrambled | sh155 | sh1189 |
|------------------|---------|-----------|-------|--------|
| <b>TERT-NHUC</b> | 1       | 0.82      | 0.21  | 0.48   |
| <b>97-7</b>      | 1       | 0.80      | 0.07  | 0.13   |
| <b>MGHU3</b>     | 1       | 1.32      | 0.49  | 0.65   |
| <b>CAL29</b>     | 1       | 1.19      | 0.12  | 0.30   |
| <b>UMUC14</b>    | 1       | 1.15      | 0.30  | 0.43   |

**Supplementary Table S2. Genes significantly up- and down-regulated in 97-7 cells with ETV5 knockdown.** Gene expression arrays were performed in triplicate for control cells transduced with empty vector, cells transduced with a scrambled shRNA, and cells transduced with one of two anti-ETV5 shRNAs (sh155 and sh1189). For the analysis, samples were divided into two groups: control cells and cells transfected with scrambled shRNA (control group, n=6), and cells transfected with either shRNA (shRNA group, n=6). Mean ratio between the shRNA and the control groups, and associated p value is reported for differentially expressed genes.

| Mean Ratio (shRNA/control) | p-value  | Gene Symbol | Gene Title                                                     |
|----------------------------|----------|-------------|----------------------------------------------------------------|
| 0.30                       | 4.10E-07 | ETV5        | ets variant 5                                                  |
| 0.39                       | 2.23E-06 | ETV5        | ets variant 5                                                  |
| 0.20                       | 1.25E-05 | ETV5        | Ets variant 5                                                  |
| 0.17                       | 3.65E-05 | ETV5        | ets variant 5                                                  |
| 0.61                       | 5.87E-05 | HIP1        | Huntingtin interacting protein 1                               |
| 0.17                       | 8.74E-05 | ETV5        | Ets variant 5                                                  |
| 0.66                       | 0.000157 | CHST11      | Carbohydrate (chondroitin 4) sulfotransferase 11               |
| 0.66                       | 0.000281 | PECAM1      | platelet/endothelial cell adhesion molecule                    |
| 0.64                       | 0.000714 | DACT1       | dapper, antagonist of beta-catenin, homolog 1 (Xenopus laevis) |
| 0.58                       | 0.000801 | WWTR1       | WW domain containing transcription regulator 1                 |
| 0.66                       | 0.000812 | PPM1H       | protein phosphatase 1H (PP2C domain containing)                |
| 0.37                       | 0.000844 | VCAN        | versican                                                       |
| 0.56                       | 0.001058 | HIP1        | huntingtin interacting protein 1                               |
| 0.63                       | 0.001116 | KLF15       | Kruppel-like factor 15                                         |
| 0.41                       | 0.001406 | SEPP1       | selenoprotein P, plasma, 1                                     |
| 0.60                       | 0.001543 | PTX3        | pentraxin-related gene, rapidly induced by IL-1 beta           |
| 0.66                       | 0.001676 | TGM2        | transglutaminase 2                                             |
| 0.65                       | 0.001721 | NRCAM       | neuronal cell adhesion molecule                                |
| 0.61                       | 0.001724 | SEC22A      | SEC22 vesicle trafficking protein homolog A (S. cerevisiae)    |
| 0.65                       | 0.0019   | LOC150051   | hypothetical LOC150051                                         |
| 0.60                       | 0.001912 | FN1         | fibronectin 1                                                  |
| 0.63                       | 0.001995 | CHST11      | Carbohydrate (chondroitin 4) sulfotransferase 11               |
| 0.61                       | 0.002121 | SERPINA1    | serpin peptidase inhibitor, clade A, member 1                  |
| 0.53                       | 0.002651 | MAP7D2      | MAP7 domain containing 2                                       |
| 0.64                       | 0.002698 | SERPINA1    | serpin peptidase inhibitor, clade A, member 1                  |
| 0.60                       | 0.002806 | NDN         | neccin homolog (mouse)                                         |
| 0.60                       | 0.00361  | CAMK2B      | calcium/calmodulin-dependent protein kinase II beta            |
| 0.67                       | 0.006253 | FHOD3       | formin homology 2 domain containing 3                          |
| 0.52                       | 0.007502 | FAM65B      | family with sequence similarity 65, member B                   |
| 0.64                       | 0.010353 | FN1         | fibronectin 1                                                  |
| 0.65                       | 0.010421 | LPL         | lipoprotein lipase                                             |
| 0.48                       | 0.010918 | AZGP1       | alpha-2-glycoprotein 1, zinc-binding                           |
| 0.64                       | 0.011721 | EPDR1       | ependymin related protein 1 (zebrafish)                        |
| 0.58                       | 0.012258 | DNAJC15     | DnaJ (Hsp40) homolog, subfamily C, member 15                   |
| 0.63                       | 0.012993 | FN1         | fibronectin 1                                                  |
| 0.63                       | 0.013036 | FN1         | fibronectin 1                                                  |
| 0.58                       | 0.013602 | EPSTI1      | epithelial stromal interaction 1 (breast)                      |
| 0.63                       | 0.013819 | FN1         | fibronectin 1                                                  |

|      |          |           |                                                              |
|------|----------|-----------|--------------------------------------------------------------|
| 0.66 | 0.014487 | HIP1      | huntingtin interacting protein 1                             |
| 0.60 | 0.015607 | KCNK5     | potassium channel, subfamily K, member 5                     |
| 0.66 | 0.015904 | AZGP1     | alpha-2-glycoprotein 1, zinc-binding                         |
| 0.65 | 0.016848 | HIST1H4B  | Histone cluster 1, H4b                                       |
| 0.63 | 0.020372 | CYLD      | cyldromatosis (turban tumor syndrome)                        |
| 0.58 | 0.020976 | DCLK1     | doublecortin-like kinase 1                                   |
| 0.65 | 0.021968 | ZNF585A   | zinc finger protein 585A                                     |
| 0.66 | 0.022417 | RUNX1     | runt-related transcription factor 1                          |
| 0.62 | 0.024915 | DPY19L2   | dpy-19-like 2 (C. elegans)                                   |
| 0.62 | 0.029795 | TFCP2L1   | transcription factor CP2-like 1                              |
| 0.49 | 0.033777 | PS1TP4    | HBV preS1-transactivated protein 4                           |
| 0.61 | 0.035881 | RC3H2     | ring finger and CCCH-type zinc finger domains 2              |
| 0.57 | 0.040383 | TFCP2L1   | transcription factor CP2-like 1                              |
| 0.63 | 0.041299 | VSTM2L    | V-set and transmembrane domain containing 2 like             |
| 0.62 | 0.044441 | ECOP      | EGFR-coamplified and overexpressed protein                   |
| 0.62 | 0.046025 | SLC8A1    | solute carrier family 8 (sodium/calcium exchanger), member 1 |
|      |          |           |                                                              |
| 1.68 | 8.35E-05 | SERPINB13 | serpin peptidase inhibitor, clade B (ovalbumin), member 13   |
| 1.79 | 0.000121 | RNF182    | ring finger protein 182                                      |
| 1.76 | 0.000181 | IGFL1     | IGF-like family member 1                                     |
| 1.50 | 0.000295 | D4S234E   | DNA segment on chromosome 4 (unique) 234 expressed sequence  |
| 2.06 | 0.000322 | SESN3     | sestrin 3                                                    |
| 1.54 | 0.000356 | FAM84A    | Family with sequence similarity 84, member A                 |
| 1.96 | 0.000459 | CAPNS2    | calpain, small subunit 2                                     |
| 1.51 | 0.000618 | LEPREL1   | leprecan-like 1                                              |
| 1.76 | 0.000735 | SERPINB13 | serpin peptidase inhibitor, clade B (ovalbumin), member 13   |
| 1.53 | 0.000856 | PPP2R2C   | protein phosphatase 2, regulatory subunit B, gamma isoform   |
| 1.57 | 0.000959 | CTSL2     | cathepsin L2                                                 |
| 1.51 | 0.001073 | GLRX      | glutaredoxin (thioltransferase)                              |
| 1.57 | 0.001128 | AKR1B10   | aldo-keto reductase family 1, member B10 (aldose reductase)  |
| 1.62 | 0.001272 | BTG2      | BTG family, member 2                                         |
| 1.64 | 0.001341 | FGFBP1    | fibroblast growth factor binding protein 1                   |
| 1.67 | 0.001398 | SERPINB13 | serpin peptidase inhibitor, clade B (ovalbumin), member 13   |
| 1.86 | 0.001714 | S100A7    | S100 calcium binding protein A7                              |
| 1.51 | 0.00182  | HSD11B2   | hydroxysteroid (11-beta) dehydrogenase 2                     |
| 1.65 | 0.002111 | KRT24     | keratin 24                                                   |
| 1.78 | 0.002448 | HES2      | hairy and enhancer of split 2 (Drosophila)                   |
| 1.53 | 0.00258  | COX7B2    | cytochrome c oxidase subunit VIIb2                           |
| 1.75 | 0.003105 | SERPINB13 | serpin peptidase inhibitor, clade B (ovalbumin), member 13   |
| 2.08 | 0.00367  | FABP4     | fatty acid binding protein 4, adipocyte                      |
| 1.59 | 0.00387  | LYPD3     | LY6/PLAUR domain containing 3                                |
| 1.52 | 0.004128 | FAM84A    | family with sequence similarity 84, member A                 |
| 1.70 | 0.00414  | CRYAB     | crystallin, alpha B                                          |
| 1.90 | 0.005649 | SESN3     | sestrin 3                                                    |
| 1.88 | 0.00701  | CNTN1     | Contactin 1                                                  |
| 1.67 | 0.007549 | SCEL      | sciellin                                                     |
| 1.91 | 0.007777 | IL1RN     | interleukin 1 receptor antagonist                            |
| 1.51 | 0.007882 | EPB41L3   | erythrocyte membrane protein band 4.1-like 3                 |
| 1.58 | 0.008332 | CNTN1     | contactin 1                                                  |
| 1.50 | 0.00847  | ENTPD4    | ectonucleoside triphosphate diphosphohydrolase 4             |
| 1.50 | 0.009824 | NFYA      | nuclear transcription factor Y, alpha                        |

|      |          |           |                                                              |
|------|----------|-----------|--------------------------------------------------------------|
| 1.68 | 0.00986  | SCEL      | sciellin                                                     |
| 1.78 | 0.011054 | CNTN1     | Contactin 1                                                  |
| 1.51 | 0.011171 | BBOX1     | butyrobetaine (gamma), 2-oxoglutarate dioxygenase 1          |
| 1.66 | 0.012022 | KRT4      | Keratin 4                                                    |
| 1.52 | 0.012504 | LOC202181 | hypothetical protein LOC202181                               |
| 1.84 | 0.013414 | SPRR1B    | small proline-rich protein 1B (cornifin)                     |
| 2.46 | 0.0148   | PTPRZ1    | protein tyrosine phosphatase, receptor-type, Z polypeptide 1 |
| 1.68 | 0.015609 | KRT4      | keratin 4                                                    |
| 1.52 | 0.016746 | CCBL2     | cysteine conjugate-beta lyase 2                              |
| 1.76 | 0.019041 | DST       | dystonin                                                     |
| 1.60 | 0.022237 | VSNL1     | visinin-like 1                                               |
| 1.95 | 0.022642 | SPRR1A    | small proline-rich protein 1A                                |
| 1.67 | 0.023611 | SERPINB3  | serpin peptidase inhibitor, clade B (ovalbumin), member 3    |
| 2.03 | 0.025302 | SPRR1A    | small proline-rich protein 1A                                |
| 1.58 | 0.025745 | CLTA      | clathrin, light chain (Lca)                                  |
| 1.79 | 0.027657 | A2ML1     | alpha-2-macroglobulin-like 1                                 |
| 2.31 | 0.028093 | GJA1      | gap junction protein, alpha 1, 43kDa                         |
| 1.64 | 0.028587 | S100A12   | S100 calcium binding protein A12                             |
| 1.71 | 0.028884 | GPX2      | glutathione peroxidase 2 (gastrointestinal)                  |
| 1.84 | 0.029502 | DSG3      | desmoglein 3 (pemphigus vulgaris antigen)                    |
| 1.54 | 0.029846 | ZNF117    | zinc finger protein 117                                      |
| 1.51 | 0.031188 | OTUB2     | OTU domain, ubiquitin aldehyde binding 2                     |
| 1.55 | 0.032795 | DST       | dystonin                                                     |
| 2.66 | 0.034061 | C14orf34  | chromosome 14 open reading frame 34                          |
| 1.90 | 0.039329 | SPRR3     | small proline-rich protein 3                                 |
| 1.62 | 0.041107 | MYEOV     | myeloma overexpressed                                        |
| 1.56 | 0.042799 | RASSF6    | Ras association (RalGDS/AF-6) domain family member 6         |
| 1.59 | 0.047392 | NCF2      | neutrophil cytosolic factor 2                                |
| 1.95 | 0.048364 | SPRR3     | small proline-rich protein 3                                 |

**Supplementary Figure S1.** Expression of ETV5 mRNA (a) and FGFR3 and ETV5 protein (c) in the FGFR3-mutant cancer cell line 97-7 after silencing (shFR3) and re-expression (shFR3+S249C) of mutant FGFR3, compared to control cells transduced with the empty vector, and cell expressing a scrambled shRNA (Scr). Expression of ETV5 mRNA (b) and FGFR3 and ETV5 protein (d) in the FGFR3-mutant cancer cell line UMUC14 after silencing (shFR3) of mutant FGFR3, compared to control cells transduced with the empty vector, and cell expressing a scrambled shRNA (Scr). ETV5 mRNA was relatively quantified using Taqman Real-Time RT-PCR with SDHA as internal control. ETV5 and FGFR3 proteins were visualized by Western Blotting with specific antibodies using beta-actin as loading control. All experiments were repeated in triplicate.

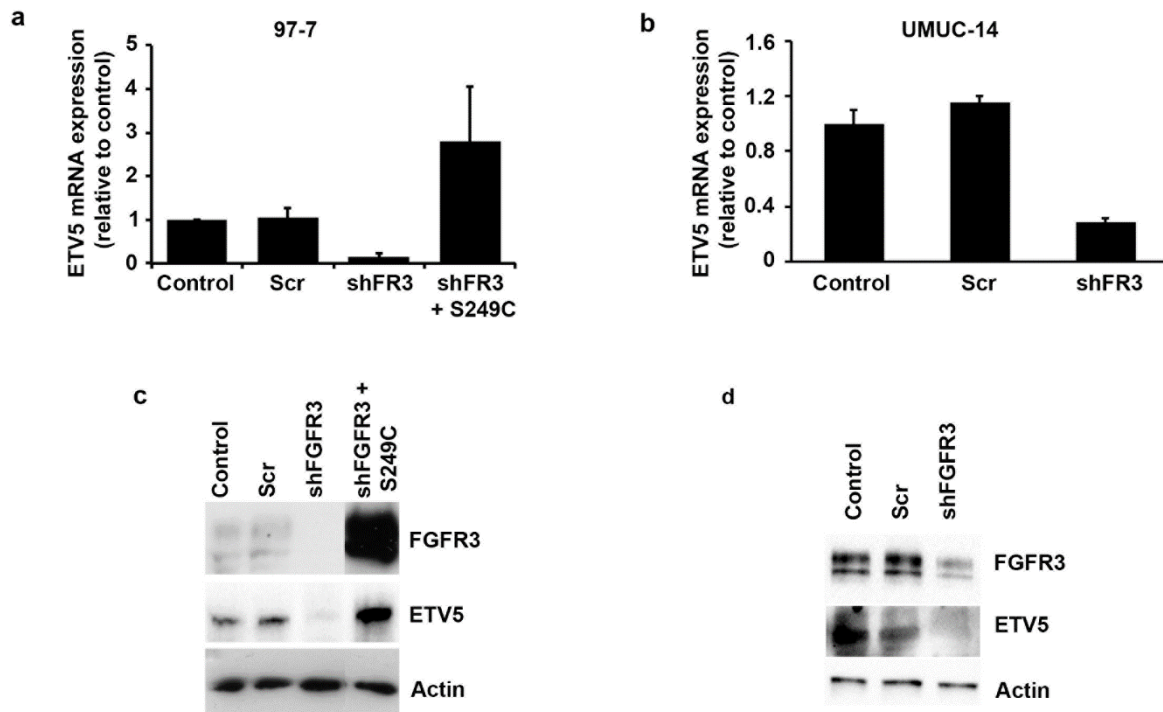

**Supplementary Figure S2.** Expression of ETV5 and known ETV5 target genes in 97-7, CAL29, UMUC14 and MGHU3 cells with ETV5 knockdown compared to control cells transduced with the empty vector. mRNA expression levels were relatively quantified using Taqman Real-Time RT-PCR with SDHA as internal control. Experiments were repeated in triplicates.

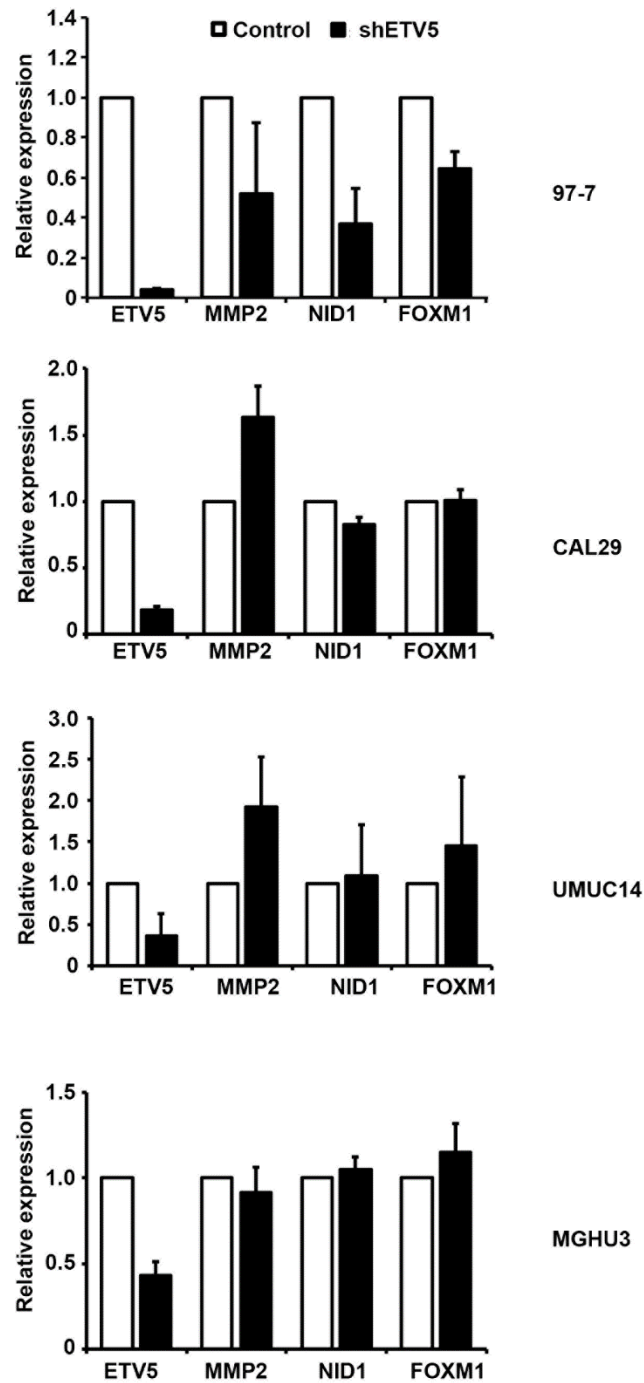

**Supplementary Figure S3. Correlation between ETV5, TAZ, CYR61 or CTGF expression in bladder tumours.** Data from two large publically available bladder tumour studies <sup>47, 48</sup> was interrogated for correlation between ETV5 and TAZ, CTGF and CYR61 mRNA expression levels, using R2 Genomics Analysis and Visualization Platform (<http://r2.amc.nl>). Gene expression levels are expressed as log 2 of the normalized intensity values.

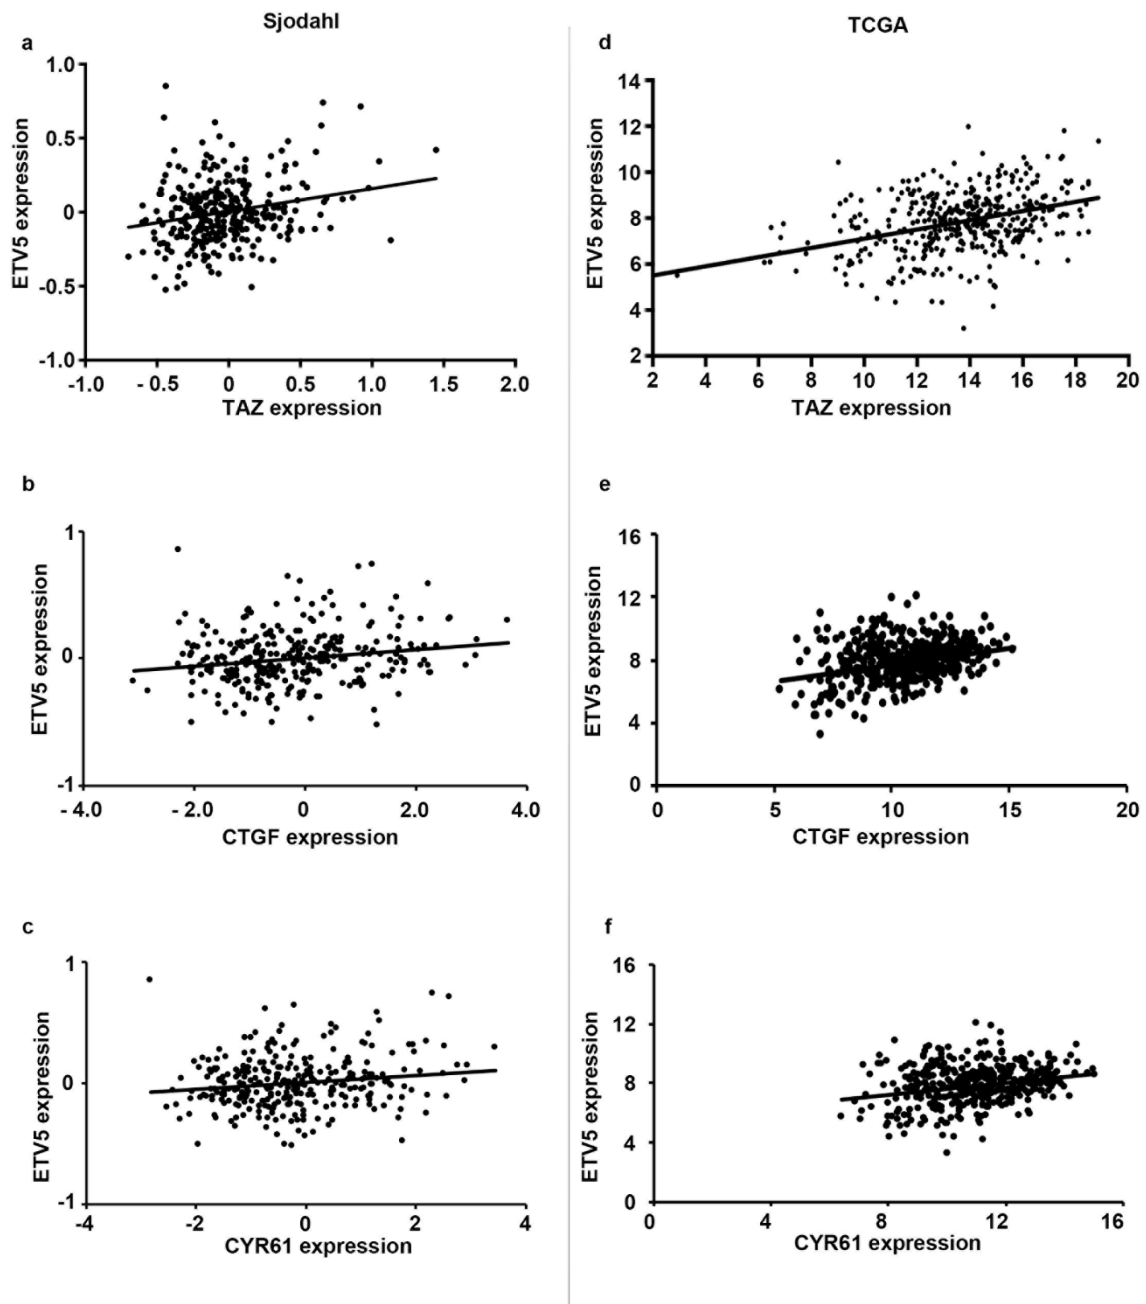

**Supplementary Figure 4.**

Images of all uncropped blots.



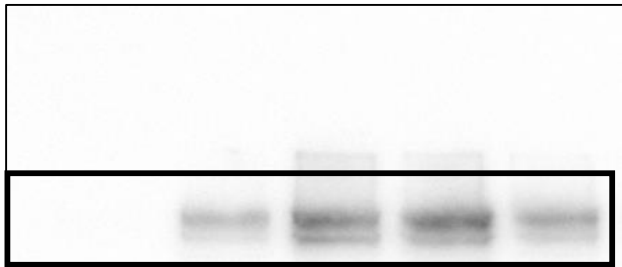

Figure 1b- FGFR3

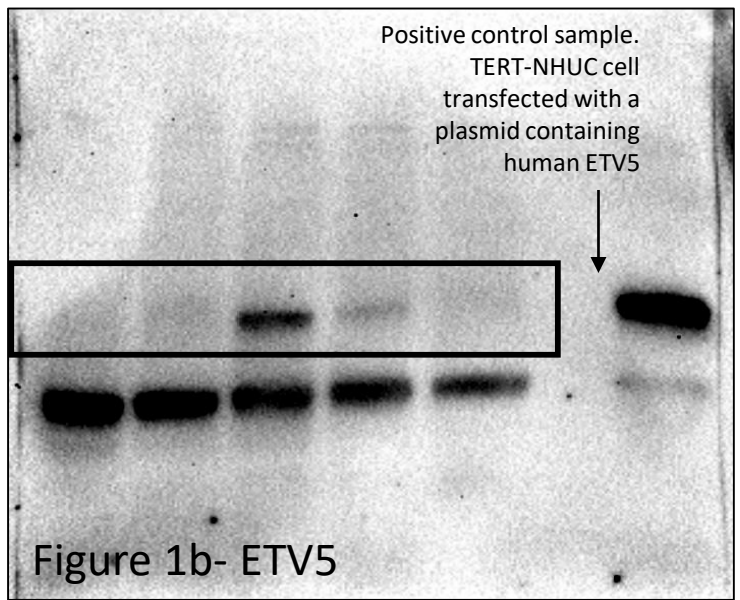

Figure 1b- ETV5

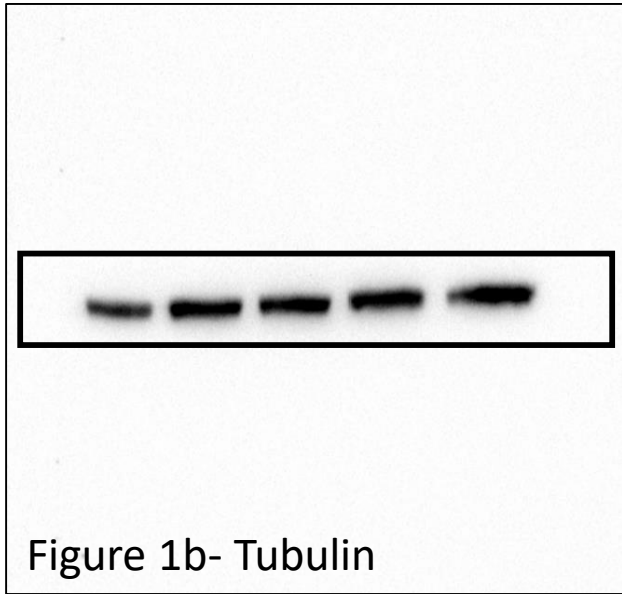

Figure 1b- Tubulin

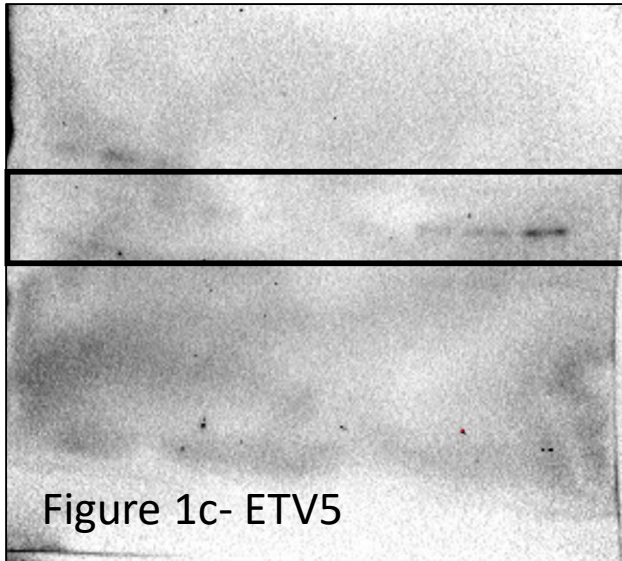

Figure 1c- ETV5

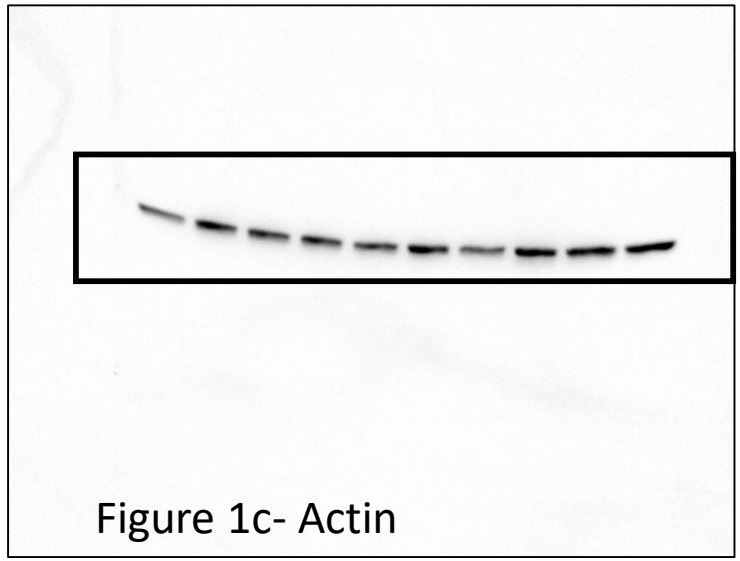

Figure 1c- Actin

Figure 1 unadjusted original blots, with sections included in main figure highlighted by the boxes

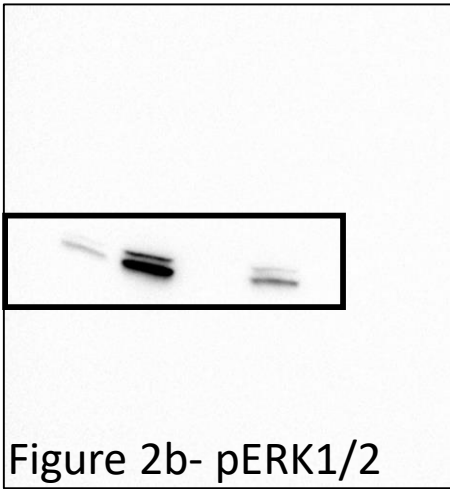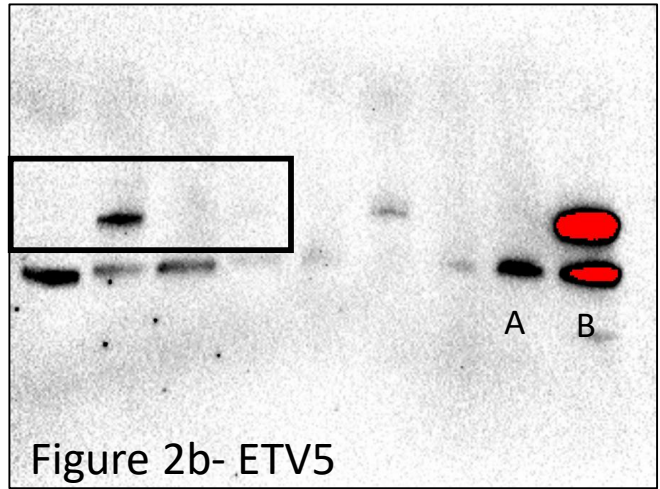

- A. Negative control. TERT-NHUC transfected with an empty plasmid.
- B. Positive control. TERT-NHUC cell transfected with a plasmid containing human ETV5

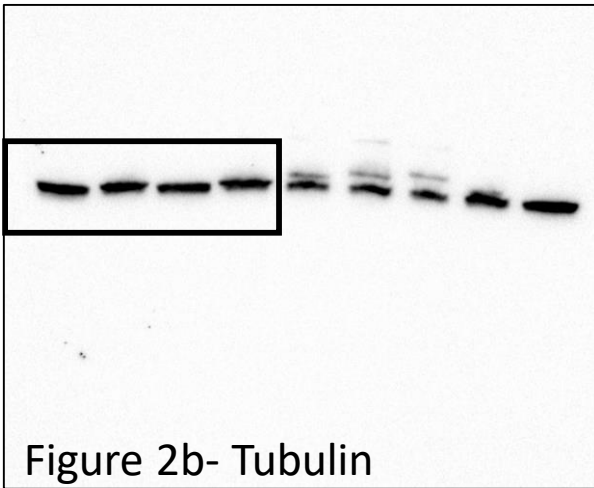

Figure 2 unadjusted original blots, with the sections included in main figure highlighted by the boxes

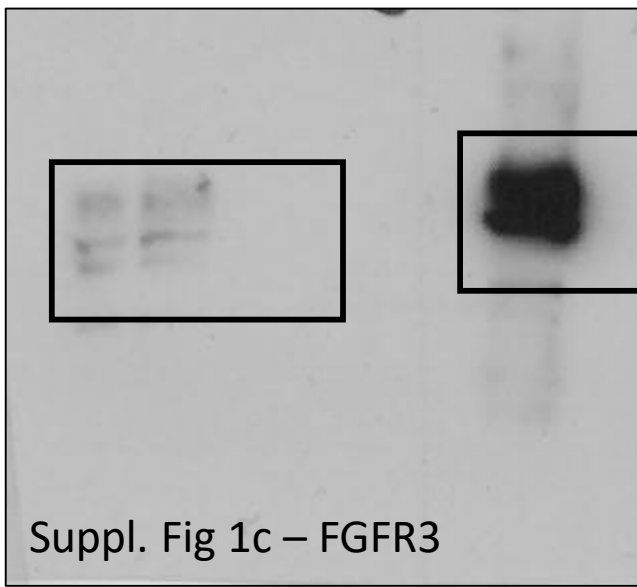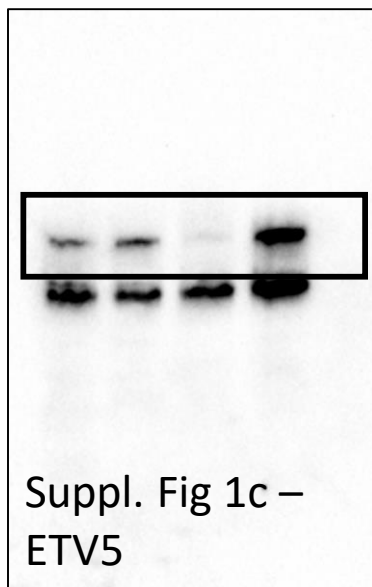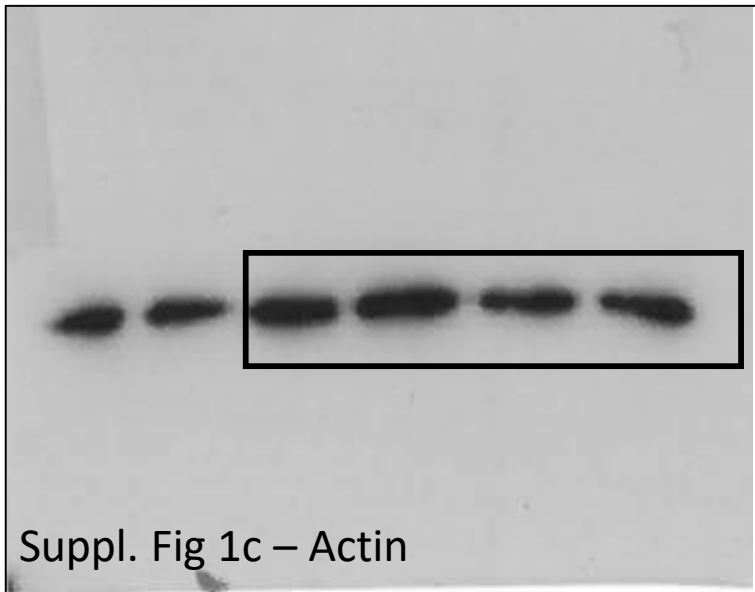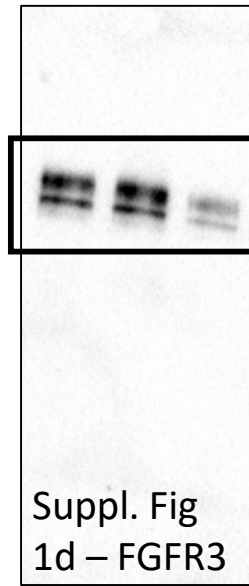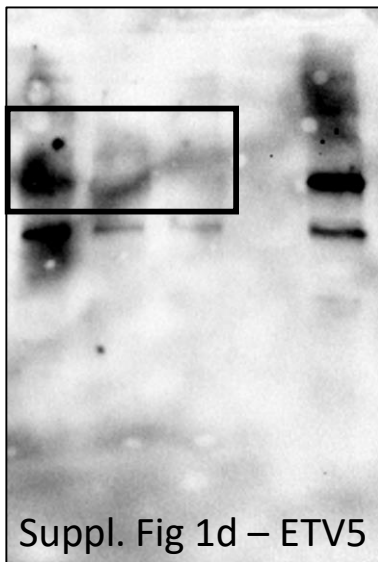

Positive control sample.  
TERT-NHUC cell  
transfected with a  
plasmid containing  
human ETV5

←

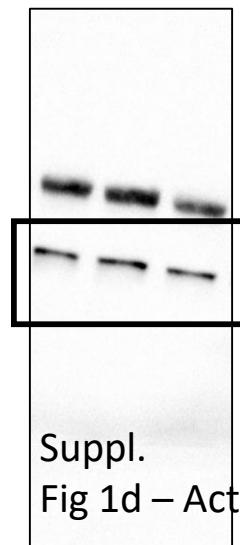

Suppl. Fig 1 unadjusted original blots, with the sections included in main figure highlighted by the boxes

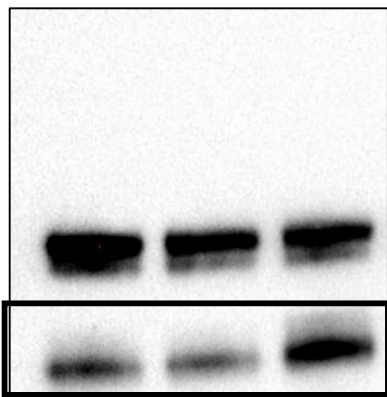

Figure 5a- TAZ

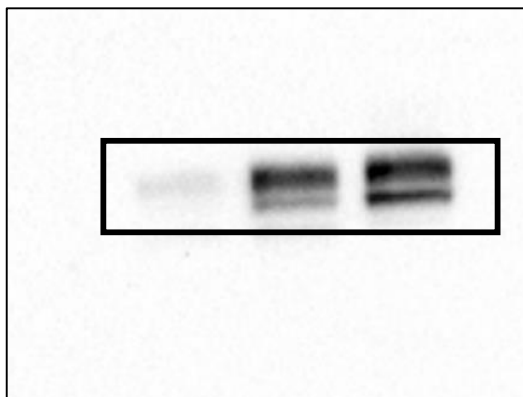

Figure 5a- FGFR3

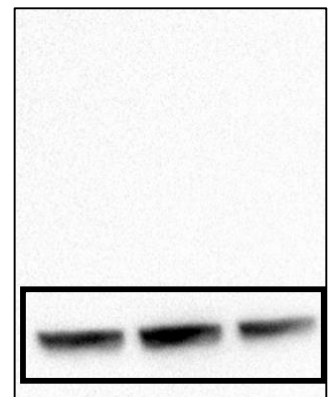

Figure 5a- Actin

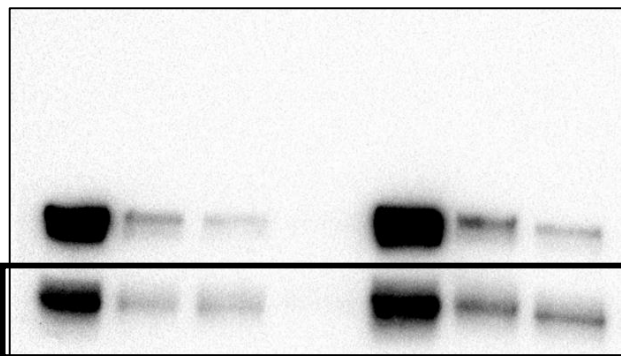

Figure 5d- TAZ

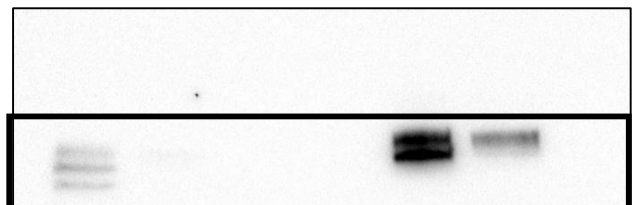

Figure 5d- FGFR3

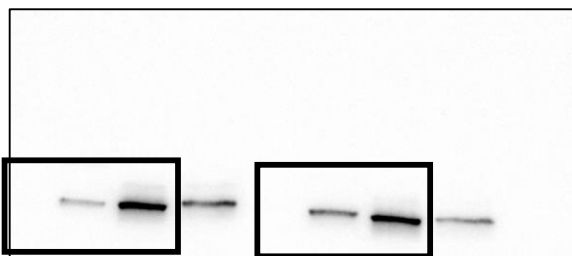

Figure 5d- Laminin

Figure 5 unadjusted original blots, with the sections included in main figure highlighted by the boxes

Note: the TAZ antibody recognizes both YAP (70 KDa) and TAZ (50KDa) as these are highly homologous protein of the same family. TAZ is the lower molecular weight band.
